# Supplementary material
Source: PubMed Central journal article supplement (PMC11521447)
Supplement: NIHMS2029042-supplement-Supplementary_Tables.pdf [file NIHMS2029042-supplement-Supplementary_Tables.pdf]

## ESM TABLES

**ESM Table 1: Antibodies used in this paper**

| Antibody                       | Brand, Catalogue number, RRID, Dilution                                                      | Used in Figures                                    |
|--------------------------------|----------------------------------------------------------------------------------------------|----------------------------------------------------|
| Insulin                        | Developmental Studies Hybridoma Bank,<br>University of Iowa, GN-ID4<br>RRID:AB_2255626 1:500 | 1a-e.                                              |
| Insulin                        | Genetex #GTX39371 RRID:AB_11177138,<br>1:1000                                                | 2c-p, 3b-c, 3d-e, 3f-k,<br>4e-f, 5f, ESM Fig 1a-d, |
| Insulin                        | R&D #MAB1417 RRID:AB_2126533 1:1000                                                          | 2q-r, 3d-e, ESM Fig 2a-b.                          |
| Ki67                           | Invitrogen #MA5-14520 RRID:AB_10979488,<br>1:200                                             | 1a-b, 2e-f, 3j-k.                                  |
| NRF2                           | Cayman Chemicals #10214, 1:250                                                               | 1c-e,2c-d, ESM Fig 1a-b.                           |
| DNA/RNA<br>Oxidative<br>Damage | Abcam #ab62623 RRID:AB_940049, 1:100                                                         | 2g-h,3b-c.                                         |
| PDX1                           | Abcam #AB47308 RRID:AB_777178, 1:250                                                         | 2q-r, 3d-e, ESM Fig 2a-b.                          |
| MAFA                           | Cell Signaling, #79737,<br>RRID:AB_2799938,1:1000                                            | 3f-g.                                              |
| Cyclin D1                      | Proteintech #60186-1-Ig<br>RRID:AB_10793718, 1:1000                                          | 3h-i                                               |
| PCNA                           | Cell Signaling, #2586, RRID:AB_2160343,<br>1:1600                                            | ESM Fig 1a-b.                                      |
| Chromogranin<br>A              | Proteintech #23342-1-AP,<br>RRID:AB_2879259,<br>1:400                                        | ESM Fig 1c-d.                                      |
| Glucagon                       | Cell Signaling, #2760, RRID: AB_659831,<br>1:100                                             | ESM Fig 1e.                                        |

**ESM Table 2: Primers used in this paper**

| Sequence Name | Forward               | Reverse               |
|---------------|-----------------------|-----------------------|
| Beta Actin    | AGCCATGTACGTAGCCATCC  | CTCTCAGCTGTGGTGGTGAA  |
| Nrf2          | AGGACATGGAGCAAGTTTGG  | TTCTTTTTCCAGCGAGGAGA  |
| mtDNA         | GAGCATCTTATCCACGCTTCC | GGTGGTACTCCCGCT GTAAA |
| gDNA          | CTTCCCCACTGGCCTCAAG   | CCAAAACCCAGTGATCCAGC  |

**ESM Table 3: Cadaveric donors' properties**

| Age Group | Age       | Sex | Race/Ethnicity     | BMI  | HbA1C mmol/mol (%) | Cause of Death |
|-----------|-----------|-----|--------------------|------|--------------------|----------------|
| Neonatal  | 1 day     | F   | White              | 14.2 | <4 (2.5)           | Anencephaly    |
|           | 1 day     | M   | White              | 13.3 | 38 (5.6)           | Anencephaly    |
|           | 2 months  | F   | White              | 13.7 | 15 (3.5)           | Anoxia         |
|           | 13 months | M   | Hispanic or Latino | 25.2 | 38 (5.6)           | Anoxia         |
|           | 15 months | M   | White              | 19.7 | 30 (4.9)           | Head trauma    |
|           | 15 months | M   | Black              | 17.8 | 40 (5.8)           | Head trauma    |
|           | 19 months | M   | White              | 16.5 | Not available      | Anoxia         |
| Child     | 2 years   | M   | White              | 20.2 | Not available      | Anoxia         |
|           | 3 years   | F   | Hispanic or Latino | 13   | 34 (5.3)           | Head trauma    |
|           | 4 years   | M   | White              | 19.7 | Not available      | Head trauma    |
|           | 5 years   | M   | White              | 21.3 | 34 (5.3)           | Head trauma    |
|           | 7 years   | F   | Black              | 18.4 | Not available      | Anoxia         |
| Adult     | 26 years  | F   | White              | 28.4 | 34 (5.3)           | Stroke         |
|           | 35 years  | M   | White              | 24.7 | 34 (5.3)           | Head trauma    |
|           | 56 years  | M   | White              | 24.4 | 30 (4.9)           | Anoxia         |
